# Supplementary material
Source: publisher site journal article supplement (https://www.dovepress.com/get_supplementary_file.php?f=362802.docx)
Supplement: Supplementary file 1 [file get_supplementary_file.php]

**Supplementary Material**

Patient Preference Studies for Advanced Prostate Cancer Treatment Along the Medical Product Life Cycle: Systematic Literature Review

Dominik Menges1, Michela C. Piatti1, Thomas Cerny2,3, Milo A. Puhan1

**Affiliations:**

*1 Epidemiology, Biostatistics and Prevention Institute (EBPI), University of Zurich (UZH), Zurich, Switzerland; 2 Foundation Board, Cancer Research Switzerland (Krebsforschung Schweiz KFS), Bern, Switzerland; 3 Human Medicines Expert Committee (HMEC), Swissmedic, Bern, Switzerland*

**Correspondence:**

Dominik Menges, MD MPH

Epidemiology, Biostatistics and Prevention Institute (EBPI), University of Zurich (UZH),

Hirschengraben 84, CH-8001 Zurich, Switzerland

Tel: +41 44 634 46 15

Email: dominik.menges@uzh.ch

**Table S1**: Search strategy for MEDLINE (accessed via PubMed)

| 1 | “patient preference”[mh] OR “patient preference”[tiab] OR “patient preferences”[tiab] OR “preference weight”[tiab] OR “treatment preference”[tiab] OR “treatment preferences”[tiab] OR “preferred treatment”[tiab] OR “preference”[tiab] OR “preferences”[tiab] |
| --- | --- |
| 2 | “risk assessment”[mh] OR “outcome and process assessment, health care”[mh] OR “risk-benefit assessment”[tiab] OR “risk-benefit assessments”[tiab] OR “benefit-risk assessment”[tiab] OR “benefit-risk assessments”[tiab] OR “benefit risk assessment”[tiab] OR “benefit risk assessments”[tiab] OR “risk benefit assessment”[tiab] OR “risk benefit assessments”[tiab] OR “risk assessment”[tiab] OR “risk assessments”[tiab] OR “risks and benefits”[tiab] OR “benefits and risks”[tiab] OR “risk”[tiab] OR “risks”[tiab] OR “trade-off”[tiab] OR “trade-offs”[tiab] OR “visual analog scale”[mh] OR “discrete choice experiment”[tiab] OR “discrete choice experiments”[tiab] OR “discrete choice model”[tiab] OR “discrete choice models”[tiab] OR “discrete choice analysis”[tiab] OR “discrete choice”[tiab] OR “best-worst scaling”[tiab] OR “best worst scaling”[tiab] OR “swing-weighting”[tiab] OR “swing weighting”[tiab] OR “conjoint analysis”[tiab] OR “conjoint analyses”[tiab] OR “visual analog scale”[tiab] OR “visual analog scales”[tiab] OR “visual analogue scale”[tiab] OR “visual analogue scales”[tiab] OR “time trade-off”[tiab] OR “time trade-offs”[tiab] |
| 3 | “prostatic neoplasms”[mh] OR “prostatic neoplasm”[tiab] OR “prostatic neoplasms”[tiab] OR “prostate neoplasm”[tiab] OR “prostate neoplasms”[tiab] OR “prostate cancer”[tiab] OR “prostate cancers”[tiab] OR “prostate carcinoma”[tiab] OR “prostate carcinomas”[tiab] OR “prostate adenocarcinoma”[tiab] OR “prostate adenocarcinomas”[tiab] OR “cancer of prostate”[tiab] OR “cancer of the prostate”[tiab] OR “prostate tumor”[tiab] OR “prostate tumors”[tiab] |
| 4 | 1 AND 2 AND 3 |
| 5 | "animals"[mh] NOT ("animals"[mh] AND "humans"[mh]) |
| 6 | 4 NOT 5 |
| Restriction | Timeframe: 01/01/2000 to 5/10/2020 |

Date of search: 05 October 2020; Search results: 471

**Table S2**: Search strategy for EMBASE (accessed via Elsevier)

| #1 | ‘patient preference’/de OR ‘patient preference*’:ti,ab OR ‘preference weight’:ti,ab OR ‘treatment preference*’:ti,ab OR ‘preferred treatment’:ti,ab OR ‘preference*’:ti,ab |
| --- | --- |
| #2 | ‘risk assessment’/de OR ‘risk-benefit assessment*’:ti,ab OR ‘benefit-risk assessment*’:ti,ab OR ‘risk benefit assessment*’:ti,ab OR ‘benefit risk assessment*’:ti,ab OR ‘risk assessment*’:ti,ab OR ‘risks and benefits’:ti,ab OR ‘benefits and risks’:ti,ab OR ‘risk*’:ti,ab OR ‘trade-off*’:ti,ab OR ‘visual analog scale’/de OR ‘discrete choice experiment*’:ti,ab OR ‘discrete choice model*’:ti,ab OR ‘discrete choice analysis’:ti,ab OR ‘discrete choice’:ti,ab OR ‘best-worst scaling’:ti,ab OR ‘best worst scaling’:ti,ab OR ‘swing-weighting’:ti,ab OR ‘swing weighting’:ti,ab OR ‘conjoint analysis’:ti,ab OR ‘conjoint analyses’:ti,ab OR ‘visual analog scale*’:ti,ab OR ‘visual analogue scale*’:ti,ab OR ‘time trade-off*’:ti,ab |
| #3 | ‘prostate tumor’/de OR ‘prostate cancer’/de OR ‘prostate carcinoma’/de OR ‘prostate adenocarcinoma’/de OR ‘prostatic intraepithelial neoplasia’/de OR ‘prostatic neoplasm*’:ti,ab OR ‘prostate neoplasm*’:ti,ab OR ‘prostate cancer*’:ti,ab OR ‘prostate carcinoma*’:ti,ab OR ‘prostate adenocarcinoma*’:ti,ab OR ‘prostatic intraepithelial neoplasia*’:ti,ab OR ‘prostate tumor*’:ti,ab OR ‘cancer of prostate’:ti,ab OR ‘cancer of the prostate’:ti,ab |
| #4 | [2000-2020]/py |
| #5 | [english]/lim OR [german]/lim |
| #6 | #1 AND #2 AND #3 AND #4 AND #5 |
| #7 | #6 NOT ([animals]/lim NOT [humans]/lim) |

Date of search: 05 October 2020; Search results: 669

**Table S3**: Records excluded during abstract and fulltext screening.

| **No.** | **Reference** | **Reason for Exclusion** |
| --- | --- | --- |
| **Exclusion in Abstract Screening Stage** | | |
| 1 | Anandadas CN, Clarke NW, Davidson SE, O'Reilly PH, Logue JP, Gilmore L, et al. Early prostate cancer--which treatment do men prefer and why? BJU Int. 2011;107(11):1762-8. | Localized prostate cancer |
| 2 | Ávila M, Becerra V, Guedea F, Suárez JF, Fernandez P, Macías V, et al. Estimating preferences for treatments in patients with localized prostate cancer. Int J Radiat Oncol Biol Phys. 2015;91(2):277-87. | Localized prostate cancer |
| 3 | Berry DL, Halpenny B, Hong F, Wolpin S, Lober WB, Russell KJ, et al. The Personal Patient Profile-Prostate decision support for men with localized prostate cancer: a multi-center randomized trial. Urol Oncol. 2013;31(7):1012-21. | Localized prostate cancer |
| 4 | Berry DL, Hong F, Blonquist TM, Halpenny B, Filson CP, Master VA, et al. Decision Support with the Personal Patient Profile-Prostate: A Multicenter Randomized Trial. J Urol. 2018;199(1):89-97. | Localized prostate cancer |
| 5 | Blinman P, King M, Norman R, Viney R, Stockler MR. Preferences for cancer treatments: an overview of methods and applications in oncology. Ann Oncol. 2012;23(5):1104-10. | No preference study |
| 6 | Cuypers M, Lamers RED, Kil PJM, van de Poll-Franse LV, de Vries M. Impact of a web-based prostate cancer treatment decision aid on patient-reported decision process parameters: results from the Prostate Cancer Patient Centered Care trial. Support Care Cancer. 2018;26(11):3739-48. | Localized prostate cancer |
| 7 | Davison BJ, Gleave ME, Goldenberg SL, Degner LF, Hoffart D, Berkowitz J. Assessing information and decision preferences of men with prostate cancer and their partners. Cancer Nurs. 2002;25(1):42-9. | Preferences unrelated to treatment |
| 8 | de Bekker-Grob EW, Bliemer MCJ, Donkers B, Essink-Bot ML, Korfage IJ, Roobol MJ, et al. Patients’ and urologists’ preferences for prostate cancer treatment: a discrete choice experiment. British Journal of Cancer. 2013;109(3):633-40. | Localized prostate cancer |
| 9 | Denberg TD, Melhado TV, Steiner JF. Patient treatment preferences in localized prostate carcinoma: The influence of emotion, misconception, and anecdote. Cancer. 2006;107(3):620-30. | Localized prostate cancer |
| 10 | Elkin EB, Cowen ME, Cahill D, Steffel M, Kattan MW. Preference assessment method affects decision-analytic recommendations: a prostate cancer treatment example. Med Decis Making. 2004;24(5):504-10. | Localized prostate cancer |
| 11 | Elkin EB, Vickers AJ, Kattan M. Primer: Using decision analysis to improve clinical decision making in urology. Nat Clin Pract Urol. 2006;3(8):439-48. | No preference study |
| 12 | Gries KS, Regier DA, Ramsey SD, Patrick DL. Preferences for Prostate Cancer Outcomes: A Comparison of the Patient Perspective, the General Population Perspective, and a Population at Risk for Prostate Cancer. Value Health. 2016;19(2):218-25. | Preferences unrelated to treatment |
| 13 | Herrmann A, Sanson-Fisher R, Hall A, Wall L, Zdenkowski N, Waller A. A discrete choice experiment to assess cancer patients’ preferences for when and how to make treatment decisions. Supportive Care Cancer. 2018;26(4):1215-20. | Focus on other treatments/patient groups |
| 14 | Hoffman RM. Improving the communication of benefits and harms of treatment strategies: decision AIDS for localized prostate cancer treatment decisions. J Natl Cancer Inst Monogr. 2012;2012(45):197-201. | No preference study |
| 15 | Ihrig A, Maatouk I, Friederich HC, Baunacke M, Groeben C, Koch R, et al. The Treatment Decision-making Preferences of Patients with Prostate Cancer Should Be Recorded in Research and Clinical Routine: a Pooled Analysis of Four Survey Studies with 7169 Patients. J Cancer Educ. 2020. | Preferences unrelated to treatment |
| 16 | Jayadevappa R, Chhatre S, Gallo JJ, Malkowicz SB, Schwartz JS, Wittink MN. Patient-Centered Approach to Develop the Patient’s Preferences for Prostate Cancer Care (PreProCare) Tool. MDM Policy & Practice. 2019;4(1):238146831985537. | Localized prostate cancer |
| 17 | Jayadevappa R, Chhatre S, Gallo JJ, Wittink M, Morales KH, Lee DI, et al. Patient-Centered Preference Assessment to Improve Satisfaction With Care Among Patients With Localized Prostate Cancer: A Randomized Controlled Trial. J Clin Oncol. 2019;37(12):964-73. | Localized prostate cancer |
| 18 | Jenkins V, Fallowfield L, Edginton T, Payne H, Hamilton E. Preferences of healthy men for two different endocrine treatment options offered for locally advanced prostate cancer. Curr Med Res Opin. 2005;21(9):1329-35. | Localized prostate cancer |
| 19 | Johnson DC, Mueller DE, Deal AM, Dunn MW, Smith AB, Woods ME, et al. Integrating Patient Preference into Treatment Decisions for Men with Prostate Cancer at the Point of Care. J Urol. 2016;196(6):1640-4. | Localized prostate cancer |
| 20 | Kaplan RM, Crespi CM, Dahan E, Saucedo JD, Pagan C, Saigal CS. Comparison of Rating Scale, Time Tradeoff, and Conjoint Analysis Methods for Assessment of Preferences in Prostate Cancer. Med Decis Making. 2019;39(7):816-26. | Localized prostate cancer |
| 21 | Knight SJ, Latini DM. Sexual side effects and prostate cancer treatment decisions: patient information needs and preferences. Cancer J. 2009;15(1):41-4. | No preference study |
| 22 | Knight SJ, Nathan DP, Siston AK, Kattan MW, Elstein AS, Collela KM, et al. Pilot study of a utilities-based treatment decision intervention for prostate cancer patients. Clin Prostate Cancer. 2002;1(2):105-14. | Localized prostate cancer |
| 23 | Knight SJ, Siston AK, Chmiel JS, Slimack N, Elstein AS, Chapman GB, et al. Ethnic variation in localized prostate cancer: a pilot study of preferences, optimism, and quality of life among black and white veterans. Clin Prostate Cancer. 2004;3(1):31-7. | Localized prostate cancer |
| 24 | Kyroudi A, Petersson K, Ozsahin E, Bourhis J, Bochud F, Moeckli R. Exploration of clinical preferences in treatment planning of radiotherapy for prostate cancer using Pareto fronts and clinical grading analysis. Phy Imaging Radiat Oncol. 2020;14. Institute of Radiation Physics, Lausanne University Hospital, Rue du Grand-Pré 1, Lausanne, Switzerland):82-6. | Localized prostate cancer |
| 25 | Lamers RED, Cuypers M, de Vries M, van de Poll-Franse LV, Ruud Bosch JLH, Kil PJM. How do patients choose between active surveillance, radical prostatectomy, and radiotherapy? The effect of a preference-sensitive decision aid on treatment decision making for localized prostate cancer. Urol Oncol. 2017;35(2):37.e9-.e17. | Localized prostate cancer |
| 26 | Lubeck DP, Grossfeld GD, Carroll PR. A review of measurement of patient preferences for treatment outcomes after prostate cancer. Urology. 2002;60(3 Suppl 1):72-7; discussion 7-8. | No preference study |
| 27 | Pieterse AH, Henselmans I, de Haes HCJM, Koning CCE, Geijsen ED, Smets EMA. Shared decision making: prostate cancer patients' appraisal of treatment alternatives and oncologists' eliciting and responding behavior, an explorative study. Patient Educ Couns. 2011;85(3):e251-9. | No preference study |
| 28 | Ramsey SD, Zeliadt SB, Fedorenko CR, Blough DK, Moinpour CM, Hall IJ, et al. Patient preferences and urologist recommendations among local-stage prostate cancer patients who present for initial consultation and second opinions. World J Urol. 2011;29(1):3-9. | No preference study |
| 29 | Rexer H, Bussar-Maatz R. [Comparison of four treatment options for low-risk prostate cancer: Preference-based randomized study for the evaluation of four treatment modalities in prostate cancer with low or "early intermediate" risk (PREFERE) - trial AP 65/11 of the AUO]. Urologe A. 2015;54(5):723-5. | Localized prostate cancer |
| 30 | Schaede U, Mahlich J, Nakayama M, Kobayashi H, Takahashi Y, Saito K, et al. Shared Decision-Making in Patients With Prostate Cancer in Japan: Patient Preferences Versus Physician Perceptions. J Glob Oncol. 2017;4. | Preferences unrelated to treatment |
| 31 | Sculpher M, Bryan S, Fry P, Winter Pd, Payne H, Emberton M. Patients' preferences for the management of non-metastatic prostate cancer: discrete choice experiment. BMJ. 2004;328(7436):382. | Localized prostate cancer |
| 32 | Smith DS, Krygiel J, Nease RF, Jr., Sumner W, 2nd, Catalona WJ. Patient preferences for outcomes associated with surgical management of prostate cancer. J Urol. 2002;167(5):2117-22. | Localized prostate cancer |
| 33 | Sommers BD, Beard CJ, D'Amico AV, Dahl D, Kaplan I, Richie JP, et al. Decision analysis using individual patient preferences to determine optimal treatment for localized prostate cancer. Cancer. 2007;110(10):2210-7. | Localized prostate cancer |
| 34 | Stalmeier PFM, van Tol-Geerdink JJ, van Lin ENJT, Schimmel E, Huizenga H, van Daal WAJ, et al. Doctors' and patients' preferences for participation and treatment in curative prostate cancer radiotherapy. J Clin Oncol. 2007;25(21):3096-100. | Preferences unrelated to treatment |
| 35 | Taylor KL, Hoffman RM, Davis KM, Luta G, Leimpeter A, Lobo T, et al. Treatment Preferences for Active Surveillance versus Active Treatment among Men with Low-Risk Prostate Cancer. Cancer Epidemiol Biomarkers Prev. 2016;25(8):1240-50. | Localized prostate cancer |
| 36 | Watson V, McCartan N, Krucien N, Abu V, Ikenwilo D, Emberton M, et al. Evaluating the Trade-Offs Men with Localized Prostate Cancer Make between the Risks and Benefits of Treatments: The COMPARE Study. J Urol. 2020;204(2):273-80. | Localized prostate cancer |
| 37 | Wiegel T, Stöckle M, Bartkowiak D. PREFEREnce-based randomized evaluation of treatment modalities in low or early intermediate-risk prostate cancer. Eur Urol. 2015;67(1):1-2. | Localized prostate cancer |
| 38 | Wilke DR, Krahn M, Tomlinson G, Bezjak A, Rutledge R, Warde P. Sex or survival: short-term versus long-term androgen deprivation in patients with locally advanced prostate cancer treated with radiotherapy. Cancer. 2010;116(8):1909-17. | Localized prostate cancer |
| 39 | Xu J, Neale AV, Dailey RK, Eggly S, Schwartz KL. Patient perspective on watchful waiting/active surveillance for localized prostate cancer. J Am Board Fam Med. 2012;25(6):763-70. | Localized prostate cancer |
| **Exclusion in Fulltext Screening Stage** | | |
| 1 | Krahn M, Ritvo P, Irvine J, Tomlinson G, Bremner KE, Bezjak A, et al. Patient and community preferences for outcomes in prostate cancer: implications for clinical policy. Med Care. 2003;41(1):153-64. | Focus on other treatments/patient groups |
| 2 | Gatta F, Gonzalez JM, Ertugrul G, Qian Y, Hauber AB, Posner J, et al. Patients’ and physicians’ preferences for approaches to bone metastases treatment in Turkey. UHOD Uluslararasi Hematol-Onkol Derg. 2015;25(2):118-29. | Localized prostate cancer |

**Table S4**: Details of the quality assessment based on the International Society of Preference and Outcome Research (ISPOR) checklist.

| **Item** | **Detail** | **De Freitas et al, 2019**1 | **Eliasson et al, 2017**2 | **Hall et al, 2019**3 | **Lloyd et al, 2008**4 | **Nakayama et al, 2018**5 | **Srinivas et al, 2020**6 | **Uemura et al, 2016**7 |
| --- | --- | --- | --- | --- | --- | --- | --- | --- |
| 1.1 | Clear definition of research question, testable hypothesis | + | + | + | + | + | + | + |
| 1.2 | Description of study perspective and decision-making or policy context | + | + | + | + | + | + | + |
| 1.3 | Stated rationale for using conjoint analysis (or other chosen method if no DCE) | + | + | + | + | + | + | + |
| 2.1 | Selection of attributes supported by evidence | + | + | + | + | + | + | + |
| 2.2 | Selection of attributes justified and consistent with theory | + | + | + | + | + | + | + |
| 2.3 | Selection of attribute levels justified by evidence and consistent with study aims | NR | NR | + | + | NR | + | + |
| 3.1 | Justification of number of attributes in each conjoint task | + | + | NA | + | + | + | + |
| 3.2 | Justification of number of profiles in each conjoint task | + | + | NA | + | + | + | + |
| 3.3 | Justification of inclusion/exclusion of opt-out option | + | + | NA | + | + | + | + |
| 4.1 | Justification of choice of experimental design | + | + | + | + | + | + | + |
| 4.2 | Evaluation of properties of experimental design | NR | NR | + | + | NR | NR | + |
| 4.3 | Appropriateness of number of included conjoint tasks (or other tasks if no DCE) | + | + | + | + | + | + | + |
| 5.1 | Sufficient motivation and explanation of tasks | + | + | NR | NR | NR | NR | NR |
| 5.2 | Appropriateness of elicitation format | + | + | + | + | + | + | + |
| 5.3 | Inclusion of other qualifying questions | NR | + | NR | NR | NR | NR | NR |
| 6.1 | Collection of appropriate respondent information | + | + | + | NR | + | + | + |
| 6.2 | Definition and provision of contextual information for attributes and levels | + | + | + | + | + | + | + |
| 6.3 | Appropriateness of the level of burden of the data collection instrument | + | + | + | + | + | + | + |
| 7.1 | Justification of the sampling strategy (eg, sample size, stratification, recruitment) | - | + | - | - | - | + | - |
| 7.2 | Justification and appropriateness of the mode of administration | + | + | + | + | + | + | + |
| 7.3 | Consideration of ethical aspects | + | + | + | + | + | + | + |
| 8.1 | Examination and testing of respondent characteristics | - | - | + | - | - | + | + |
| 8.2 | Examination of quality of responses (eg, rationality, validity, reliability) | - | - | - | + | - | + | + |
| 8.3 | Appropriateness of model estimation | + | + | + | + | + | + | + |
| 9.1 | Reflection of testable hypotheses and statistical uncertainty in study results | + | + | + | + | + | + | + |
| 9.2 | Study conclusions supported by evidence and compared with existing literature | + | + | + | + | + | + | + |
| 9.3 | Adequacy of discussion of study limitations and generalizability | + | + | + | + | + | + | + |
| 10.1 | Adequacy of motivation for study importance and research context | + | + | + | + | + | + | + |
| 10.2 | Description of data collection instrument and methods | + | + | + | + | + | + | + |
| 10.3 | Clear and understandable statement about study implications | + | + | + | + | + | + | + |

*Legend: Quality assessment was performed based on the International Society of Preference and Outcome Research (ISPOR) checklist (Bridges et al, 2011*8*). Items that were considered to be fulfilled by the different studies are marked with a plus symbol (+; green shading), while items that were considered not fulfilled are marked with a minus symbol (-; red shading). Items that were insufficiently reported by studies but were judged as potentially fulfilled by the authors were categorized as not reported (NR; yellow shading); due the study design employed by Hall et al (time trade-off), three items specific to conjoint analysis (items 3.1-3.3 related to task construction) were not evaluated (NA; grey shading).*

**References**

1. de Freitas HM, Ito T, Hadi M, et al. Patient Preferences for Metastatic Hormone-Sensitive Prostate Cancer Treatments: A Discrete Choice Experiment Among Men in Three European Countries. *Adv Ther*. 2019;36(2):318-332. doi:10.1007/s12325-018-0861-3

2. Eliasson L, de Freitas HM, Dearden L, Calimlim B, Lloyd AJ. Patients’ Preferences for the Treatment of Metastatic Castrate-resistant Prostate Cancer: A Discrete Choice Experiment. *Clin Ther*. 2017;39(4):723-737. doi:10.1016/j.clinthera.2017.02.009

3. Hall F, de Freitas HM, Kerr C, et al. Estimating utilities/disutilities for high-risk metastatic hormone-sensitive prostate cancer (mHSPC) and treatment-related adverse events. *Qual Life Res*. 2019;28(5):1191-1199. doi:10.1007/s11136-019-02117-9

4. Lloyd A, Penson D, Dewilde S, Kleinman L. Eliciting patient preferences for hormonal therapy options in the treatment of metastatic prostate cancer. *Prostate Cancer Prostatic Dis*. 2008;11(2):153-159. doi:10.1038/sj.pcan.4500992

5. Nakayama M, Kobayashi H, Okazaki M, Imanaka K, Yoshizawa K, Mahlich J. Patient Preferences and Urologist Judgments on Prostate Cancer Therapy in Japan. *Am J Mens Health*. 2018;12(4):1094-1101. doi:10.1177/1557988318776123

6. Srinivas S, Mohamed AF, Appukkuttan S, et al. Patient and caregiver benefit‐risk preferences for nonmetastatic castration‐resistant prostate cancer treatment. *Cancer Med*. 2020;9(18):6586-6596. doi:10.1002/cam4.3321

7. Uemura H, Matsubara N, Kimura G, et al. Patient preferences for treatment of castration-resistant prostate cancer in Japan: a discrete-choice experiment. *BMC Urol*. 2016;16(1):63. doi:10.1186/s12894-016-0182-2

8. Bridges JFP, Hauber AB, Marshall D, et al. Conjoint Analysis Applications in Health—a Checklist: A Report of the ISPOR Good Research Practices for Conjoint Analysis Task Force. *Value Health*. 2011;14(4):403-413. doi:10.1016/j.jval.2010.11.013
